# Supplementary material
Source: PubMed Central journal article supplement (PMC10653158)
Supplement: NIHMS1864710-supplement-1.pdf [file NIHMS1864710-supplement-1.pdf]

**Supplemental information:****Supplemental Table 1.** Kappa for view agreement**Supplemental Table 2** View label agreement confusion matrix**Supplemental Table 3:** View Label Cohorts across Train/Test Splits**Supplemental Table 4:** Internal validation of view classifier on TMED-2 test sets.**Supplemental Table 5:** External validation of view classifier on Stanford EchoNet.**Supplemental Table 6:** AS diagnosis classifier balanced accuracy on TMED-2 test set**Supplemental Figure 1.** Image labeling tool**Supplemental Figure 2.** Diagnosis Classification Accuracy as a Function of Sample Size.**Supplemental Figure 3.** Projections of View Classifier Error Rate vs Sample Size

**Supplemental Table 1 and Supplemental Table 2:** View label agreement

| <b>Kappa Statistics</b> |                 |                       |                              |        |
|-------------------------|-----------------|-----------------------|------------------------------|--------|
| <b>Statistic</b>        | <b>Estimate</b> | <b>Standard Error</b> | <b>95% Confidence Limits</b> |        |
| <b>Simple Kappa</b>     | 0.8262          | 0.0094                | 0.8077                       | 0.8447 |
| <b>Weighted Kappa</b>   | 0.8987          | 0.0065                | 0.8859                       | 0.9115 |

| <b>Table</b>     |             |            |               |                 |             |                 |               |            |                 |              |
|------------------|-------------|------------|---------------|-----------------|-------------|-----------------|---------------|------------|-----------------|--------------|
| <b>E(E)</b>      | <b>L(L)</b> |            |               |                 |             |                 |               |            |                 |              |
| <b>Frequency</b> | <b>A2C</b>  | <b>A4C</b> | <b>CW AoV</b> | <b>No Label</b> | <b>PLAX</b> | <b>PSAX AoV</b> | <b>PW AoV</b> | <b>TEE</b> | <b>Vascular</b> | <b>Total</b> |
| <b>A2C</b>       | 117         | 1          | 0             | 8               | 0           | 0               | 0             | 0          | 0               | 126          |
| <b>A4C</b>       | 2           | 208        | 0             | 23              | 0           | 0               | 0             | 0          | 0               | 233          |
| <b>CW AoV</b>    | 0           | 0          | 109           | 124             | 0           | 0               | 0             | 0          | 0               | 233          |
| <b>No Label</b>  | 9           | 29         | 26            | 1399            | 44          | 1               | 5             | 0          | 0               | 1513         |
| <b>PLAX</b>      | 0           | 0          | 0             | 12              | 220         | 0               | 0             | 0          | 0               | 232          |
| <b>PSAX AoV</b>  | 0           | 0          | 0             | 10              | 0           | 88              | 0             | 0          | 0               | 98           |
| <b>PW AoV</b>    | 0           | 0          | 0             | 18              | 0           | 0               | 78            | 0          | 0               | 96           |
| <b>TEE</b>       | 0           | 0          | 0             | 0               | 0           | 0               | 0             | 158        | 0               | 158          |
| <b>Vascular</b>  | 0           | 0          | 0             | 0               | 0           | 0               | 0             | 0          | 60              | 60           |
| <b>Total</b>     | 128         | 238        | 135           | 1594            | 264         | 89              | 83            | 158        | 60              | 2749         |

**Supplemental Table 1 and Supplemental Table 2.** View label agreement 50 studies were selected as a test set. These studies were heldout and each labeled by two sonographers. View labels representing A2C (apical 2 chamber), A4C (apical 4 chamber), CW AoV (continuous wave Doppler across the aortic valve), PW AoV (pulse wave Doppler across the aortic valve), PLAX (parasternal long axis), PSAX (parasternal short axis of the aortic valve), TEE (transesophageal images), and vascular (non-cardiac images) were labeled. Kappa for agreement was calculated.

**Supplemental Table 3: View Label Cohorts across Train/Test Splits**

|                 | Number of Labeled Images |      |      |      |      |                     | Unlabeled Images |
|-----------------|--------------------------|------|------|------|------|---------------------|------------------|
|                 | <b>Total</b>             | PLAX | PSAX | A4C  | A2C  | Other-or-A4C-or-A2C | <b>Total</b>     |
| Train           | 10253                    | 2879 | 1008 | 1380 | 1050 | 3936                | 16112            |
| Valid           | 3505                     | 965  | 357  | 399  | 309  | 1473                | 5150             |
| Test            | 3511                     | 964  | 359  | 426  | 311  | 1451                | 5332             |
| View-only Train | 7694                     | 2564 | 1005 | 2359 | 1766 | 0                   | 37576            |
| Unlabeled Train | 353500                   | -    | -    | -    | -    | -                   | -                |

**Supplemental Table 3: View Label Cohorts.** Dataset Counts for 5-way view classification task. Arranged by Image number according to view label, reporting the mean over 3 splits. No split deviates more than 9% from the mean.

**Supplemental Table 4: Internal validation of view classifier on TMED-2 test sets**

| Development Set Size<br>number studies<br>(train/valid) | Split1<br>balanced<br>accuracy<br>(2.5, 97.5th) | Split2<br>balanced<br>accuracy<br>(2.5, 97.5th) | Split3<br>balanced<br>accuracy<br>(2.5, 97.5th) | Average<br>balanced<br>accuracy<br>(2.5, 97.5th) |
|---------------------------------------------------------|-------------------------------------------------|-------------------------------------------------|-------------------------------------------------|--------------------------------------------------|
| 479 (360 / 119)                                         | 96.72<br>(95.84, 97.53)                         | 97.23<br>(96.41, 98.00)                         | 97.14<br>(96.61, 98.09)                         | <b>97.03</b><br><b>(95.85, 97.54)</b>            |
| 165                                                     | 95.47<br>(94.47, 96.41)                         | 95.46<br>(94.44, 96.43)                         | 96.38<br>(95.49, 97.24)                         | <b>95.77</b><br><b>(94.46, 96.44)</b>            |
| 56                                                      | 88.99<br>(87.55, 90.34)                         | 89.99<br>(88.47, 91.42)                         | 92.03<br>(90.72, 93.28)                         | <b>90.34</b><br><b>(87.52, 90.35)</b>            |

**Supplemental Table 4:** Internal validation of view classifier on TMED-2 test sets. The view classifier is trained to produce a 5-way probabilistic view classification (PLAX, PSAX AoV, A4C, A2C, or Other) given a single image. We report balanced accuracy across 3 training/test splits of the TMED-2 dataset with a 95% bootstrap CI in parentheses.

**Supplemental Table 5: External validation of view classifier on Stanford EchoNet**

| Development Set Size<br>number studies<br>(train/valid) | Split1<br>A4C accuracy<br>(2.5, 97.5th) | Split2<br>A4C accuracy<br>(2.5, 97.5th) | Split3<br>A4C accuracy<br>(2.5, 97.5th) | Average<br>A4C accuracy<br>(2.5, 97.5th) |
|---------------------------------------------------------|-----------------------------------------|-----------------------------------------|-----------------------------------------|------------------------------------------|
| 479 (360 / 119)                                         | 95.02<br>(94.61, 95.45)                 | 92.99<br>(92.31, 93.33)                 | 92.21<br>(92.11, 93.17)                 | <b>93.41</b><br><b>(93.21, 93.77)</b>    |
| 165                                                     | 70.57<br>(69.69, 71.48)                 | 90.02<br>(89.43, 90.60)                 | 82.84<br>(82.11, 83.57)                 | <b>81.14</b><br><b>(80.72, 81.58)</b>    |
| 56                                                      | 61.30<br>(60.33, 62.24)                 | 55.29<br>(54.34, 56.28)                 | 81.66<br>(80.90, 82.41)                 | <b>66.08</b><br><b>(65.55, 66.61)</b>    |

**Supplemental Table 5:** External validation of view classifier on Stanford EchoNet. We evaluate the TMED-2 trained classifier on all 10030 A4C view images in the Stanford EchoNet Dynamic dataset. We report accuracy (fraction of A4C views correctly identified) across 3 training splits of the TMED-2 training set, with a 95% bootstrap CI in parentheses.

**Supplemental Table 6: AS diagnosis classifier balanced accuracy on TMED-2 test set**

| Dev Set Size<br>number<br>studies<br>(train/valid) | Method              | Split1<br>balanced<br>accuracy<br>(2.5, 97.5th) | Split2<br>balanced<br>accuracy<br>(2.5, 97.5th) | Split3<br>balanced<br>accuracy<br>(2.5, 97.5th) | <b>Average</b><br>balanced<br>accuracy |
|----------------------------------------------------|---------------------|-------------------------------------------------|-------------------------------------------------|-------------------------------------------------|----------------------------------------|
| 479<br>(360/119)                                   | Simple<br>Average   | 35.16<br><br>(31.82, 38.97)                     | 35.29<br><br>(33.33, 38.27)                     | 34.18<br><br>(31.37,37.50)                      | 34.88                                  |
|                                                    | Prioritized<br>View | 74.63<br><br>(66.73, 82.24)                     | 72.61<br><br>(66.05,79.24)                      | 76.24<br><br>(69.62,82.87)                      | 74.49                                  |

**Supplemental Table 6:** AS diagnosis classifier balanced accuracy on TMED-2 test set. We report balanced accuracy for this 3-class problem (no AS, early AS, significant AS), with 95% bootstrap CI in parentheses. Random chance would have 33.33% balanced accuracy.

## Supplemental Figure 1: Image Labeling Tool Diagram

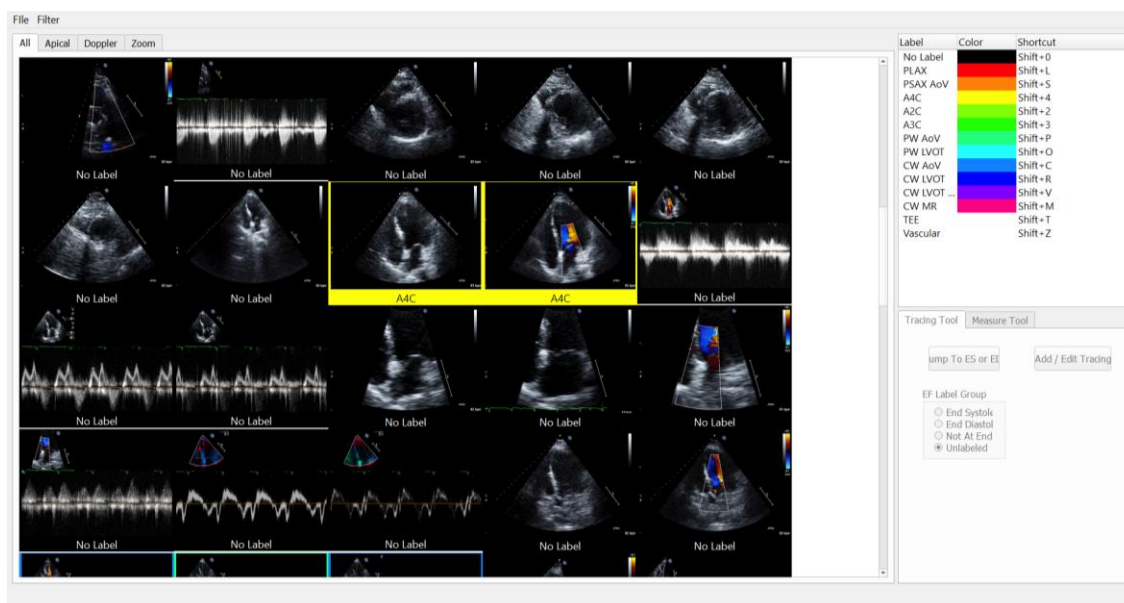

**Supplemental Figure 1:** Image labeling tool diagram. Labeling tool displays de-identified images in an array that allows rapid assignment of view labels using quick keys for the labels of interest.

**Supplemental Figure 2. Diagnosis Classification Accuracy as a Function of Sample Size**

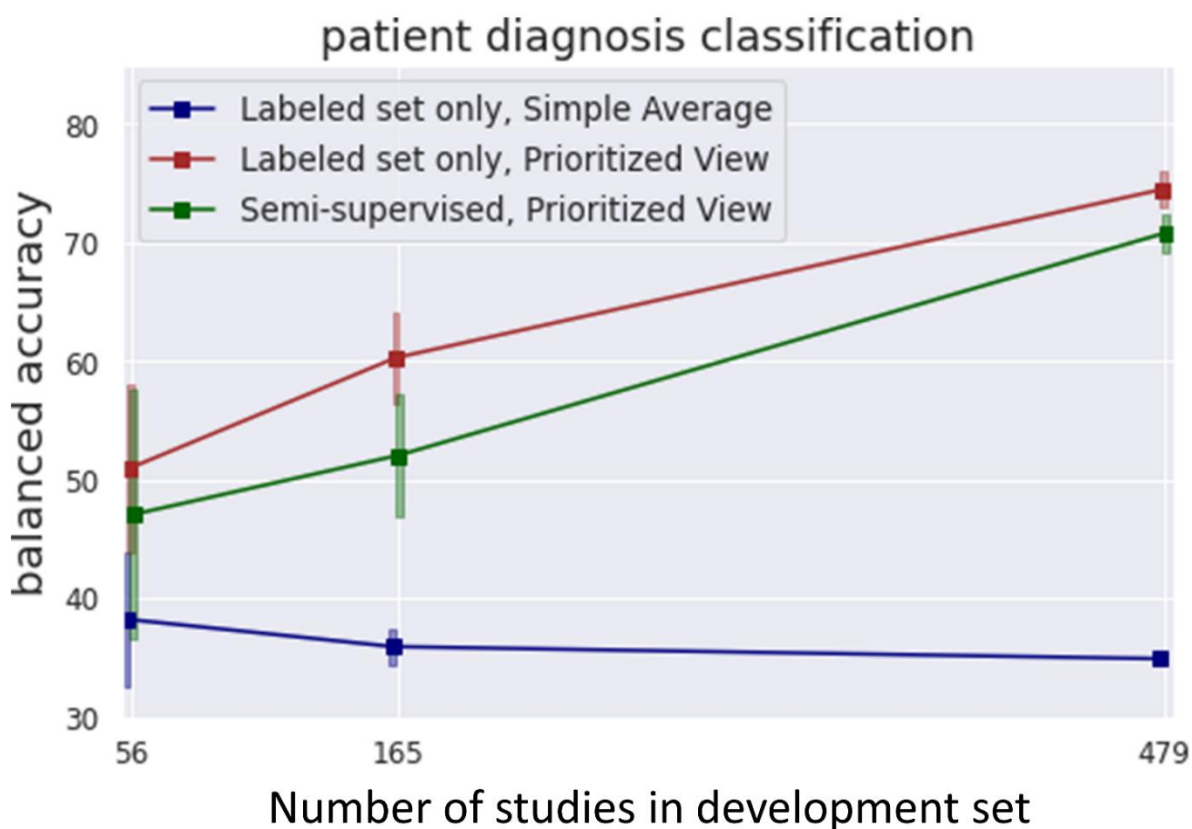

**Supplemental Figure 2. Diagnosis Classification Accuracy as a Function of Sample Size.** We plot balanced accuracy across all studies in the TMED-2 test set (*y-axis*) versus the number of studies available for model development (training and validation, *x-axis*). Each line gives the performance of one prediction strategy for aggregating across all images in a study: Prioritized View and Simple Average. Square markers give the average over 3 splits, and the color bar represents standard deviation.



**Supplemental Figure 3. Projections of View Classifier Error Rate vs Sample Size**

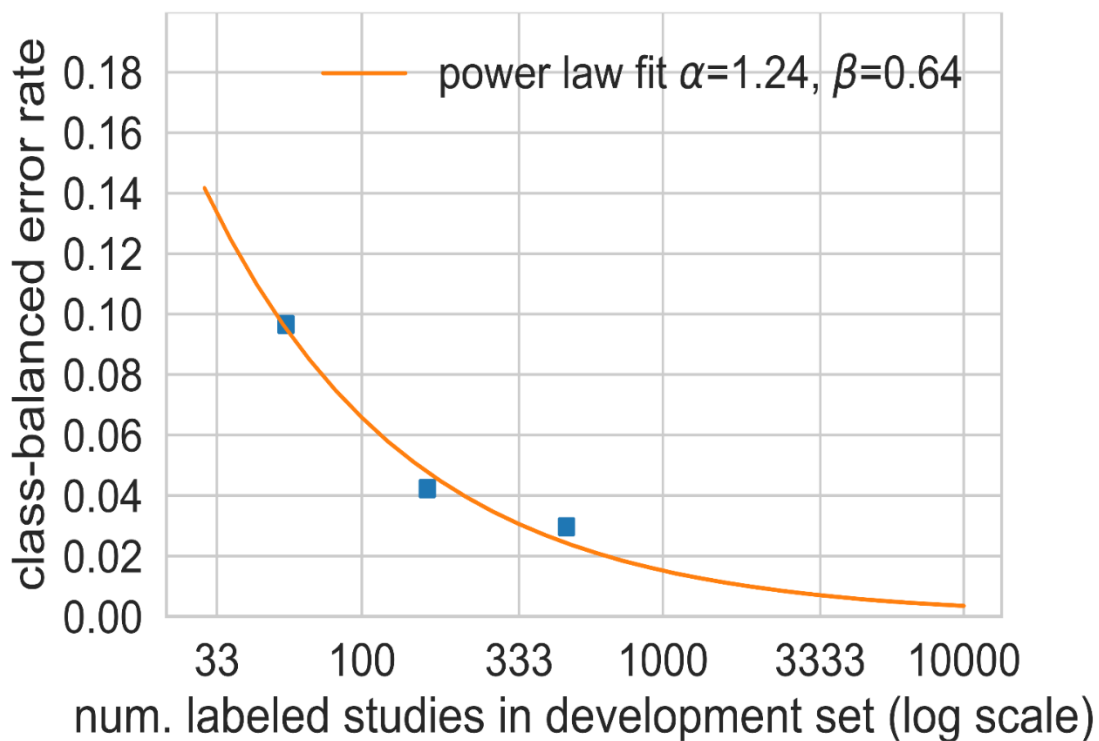

**Supplemental Figure 3.** Projections of View Classifier Error Rate as Training Set Size Increases. As amount of available labeled data increases, using the power law scaling rule  $\alpha n^{-\beta}$  fit to minimize squared error with the three measurements shown. With this prediction, 1000 labeled studies available for training and validation (double our current release's amount) would yield a balanced error rate of 1.5%, equivalent to balanced accuracy of 98.5%.
